# Supplementary material for: Practical Utility of Liquid Biopsies for Evaluating Genomic Alterations in Castration-Resistant Prostate Cancer
Source: Cancers (Basel). 2023 May 20;15(10):2847. doi: 10.3390/cancers15102847 (PMC10216019; doi:10.3390/cancers15102847)
Supplement: Supplementary file 1 [file cancers-15-02847-s001.zip › Supplementary Table S1.xlsx]

## Sheet: Sheet1
Supplementary Table S1. Genes of the AlphaLiquid®100
ABL1	BCR	CD274	CTNNB1	FGFR2	IGF1R	MAPK1	MYCN	PALB2*	PTPN11	RIT1	TERT
AKT	BRAF	CDH1	DDR2	FGFR3	JAK2	MAPK3	NF1	PDCD1LG2	RAD51B*	RNF43	TOP2A
AKT2	BRCA1*	CDK4	DPYD	FLT3	JAK3	MDM2	NF2	PDGFRA	RAD51C*	ROS1	TP53
ALK	BRCA2*	CDK6	EGFR	GATA3	KDM6A	MET	NFE2L2	PDGFRB	RAD51D*	RUNX1	TSC1
APC	BRIP1*	CDK12*	ERBB2	GNA11	KDR	MLH1	NOTCH1	PIK3CA	RAD54L*	SETD2	TSC2
AR	BTK	CDKN2A	ERBB3	GNAQ	KEAP1	MPL	NPM1	PIK3R1	RAF1	SMAD4	U2AF1
ARAF	CBL	CEBPA	ESR1	GNAS	KIT	MSH2	NRAS	PMS2	RB1	SMO	UGT1A1
ARID1A	CCND1	CHEK1*	FANCL*	HRAS	KRAS	MSH6	NTRK1	PPP2R1A	RET	STAG2	VHL
ATM*	CCND2	CHEK2*	FBXW7	IDH1	MAP2K1	MTOR	NTRK2	PPP2R2A*	RHEB	STK11
BARD1*	CCNE1	CSF1R	FGFR1	IDH2	MAP2K2	MYC	NTRK3	PTEN	RHOA	TCF7L2
* HRR gene
