# Supplementary material for: Practical Utility of Liquid Biopsies for Evaluating Genomic Alterations in Castration-Resistant Prostate Cancer
Source: Cancers (Basel). 2023 May 20;15(10):2847. doi: 10.3390/cancers15102847 (PMC10216019; doi:10.3390/cancers15102847)
Supplement: Supplementary file 1 [file cancers-15-02847-s001.zip › Supplementary Table S2.xlsx]

## Sheet: Sheet1
Supplemental Table S2. Predicted pathogenicity scores of the suspected and other VUS HRR mutations.
					Pathogenicity score
sample_id	Gene	Mutation	Effect	VAF %	EVE	MetaRNN	BayesDel
Suspected HRR mutations
024-LYD	RAD51D	A80T	missense	0.1	ND	0.67*	0.77*
029-YCW	CHEK1	H128Y	missense	0.1	ND	0.97*	0.86*
036-JBJ	ATM	G2869R	missense	0.2	0.88*	0.97*	0.94*
042-KMY	BRCA1	S646I	missense	1.5	0.82*	0.85*	0.91*
045-CMH	RAD54L	V293L	missense	0.1	ND	0.94*	0.82*
046-KST	CHEK1	F70L	missense	1.2	ND	0.62*	0.68*
053-PJH	CDK12	T931P	missense	9.2	ND	0.92*	0.83*
053-PJH	CDK12	A876E	missense	4.6	ND	0.97*	0.86*
055-HJH	ATM	L715P	missense	0.1	0.58	0.83*	0.87*
058-MJK	BRCA1	E1367G	missense	0.1	0.74*	0.46	0.71*
061-KYM	BRCA2	F2083S	missense	12.2	ND	0.75*	0.69*
066-JHK	ATM	W412L	missense	0.1	ND	0.84*	0.76*
068-CBK	ATM	T2853M	missense	0.2	0.89*	0.94*	0.82*
071-KWW	CDK12	G909E	missense	4.7	ND	0.91*	0.66*
080-LTK	BRIP1	A551V	missense	22.7	ND	0.74*	0.72*
088-SYH	ATM	E2295D	missense	0.2	0.69*	0.8*	0.74*
other VUS HRR mutations
005-AHK	BRCA2	Q2893L	missense	12	ND	0.56	0.66*
010-KHK	BRIP1	R965K	missense	0.3	ND	0.07	0.26
010-KHK	CDK12	R93Q	missense	0.1	ND	0.32	0.41
011-LCH	BRIP1	R965K	missense	0.3	ND	0.07	0.26
016-KSK	CDK12	R99C	missense	0.1	ND	0.42	0.43
016-KSK	CDK12	R322Q	missense	0.1	ND	0.48	0.55
022-AJS	CDK12	S77R	missense	0.3	ND	0.6	0.55
028-MYH	ATM	S2860del	inframe deletion	9.5	ND	ND	ND
029-YCW	CHEK1	H128Y	missense	0.1	ND	0.58	0.34
030-LHS	CDK12	R99C	missense	0.1	ND	0.42	0.43
038-PBH	CDK12	L1304I	missense	0.2	ND	0.53	0.55
040-KKI	BRCA2	D1096E	missense	1.1	ND	0.43	0.46
041-CPS	BRCA2	V849E	missense	0.8	ND	0.42	0.39
041-CPS	ATM	D2595N	missense	0.4	ND	0.78	0.54
041-CPS	BRCA2	P2735=	synonymous	0.4	ND	ND	ND
043-LWK	ATM	I1237V	missense	1.5	0.07	0.13	0.26
046-KST	CHEK1	F70L	missense	1.2	ND	0.59	0.66*
049-LKS	BRIP1	Q728=	synonymous	0.4	ND	ND	ND
058-MJK	ATM	K2089E	missense	0.3	0.09	0.1	0.1
058-MJK	BRIP1	R965K	missense	0.2	ND	0.07	0.26
059-JJP	CDK12	Q562H	missense	1.2	ND	0.17	0.32
061-KYM	BARD1	T351M	missense	0.2	ND	0.1	0.13
061-KYM	BRCA2	S2052P	missense	0.2	ND	0.61	0.66*
063-CHD	CDK12	c.2419+1G>A	splice donor	1.1	ND	ND	ND
063-CHD	BRIP1	L1058=	synonymous	0.2	ND	ND	ND
065-KYT	CDK12	c.2847-1G>T	splice acceptor	9	ND	ND	ND
066-JHK	CHEK2	A480T	missense	0.1	ND	0.72*	0.51
067-SSE	BRCA1	N1235K	missense	0.1	0.19	0.09	0.5
* : predicted deleterious
